# Supplementary material for: To Inject or to Reject? The Body Image Perception among Aesthetic Dermatology Patients
Source: MDPI journal article supplement (doi:10.3390/jcm12010172), 2022-12-26
Supplement: s1 [file s1]

Table S1. The influence of cosmetic procedures and treatment satisfaction history on body appreciation (FAS, BAS-2) and body image (BSQ-16) outcomes.

|        | First time AP<br>(Y/N) | Treatment satisfaction after<br>APs (Y/N) |
|--------|------------------------|-------------------------------------------|
| FAS    | N.S.                   | N.S.                                      |
| BAS-2  | N.S.                   | N.S.                                      |
| BSQ-16 | N.S.                   | N.S.                                      |

FAS – Functionality Appreciation Scale, BAS-2 – Body Appreciation Scale-2 , BSQ-16 – Body Shape Questionnaire - 16 , AP – aesthetic procedure

N.S. – not significant ( $p>0.05$ )
